# Supplementary material
Source: publisher figshare collection journal article supplement (https://acs.figshare.com/ndownloader/files/4382815)
Supplement: Supplementary file 1 [file 4382815]

Supporting Information for:

# Selective Formation of Latticed- Nanostructure with precise alignment of DNA-templated Gold Nanowires

Hyung Jin Kim, Yonghan Roh, and Byungyou Hong\*

School of Information and Communication Engineering, Sungkyunkwan University,

Suwon 440-746, Republic of Korea

[\\*byhong@skku.edu](mailto:byhong@skku.edu)

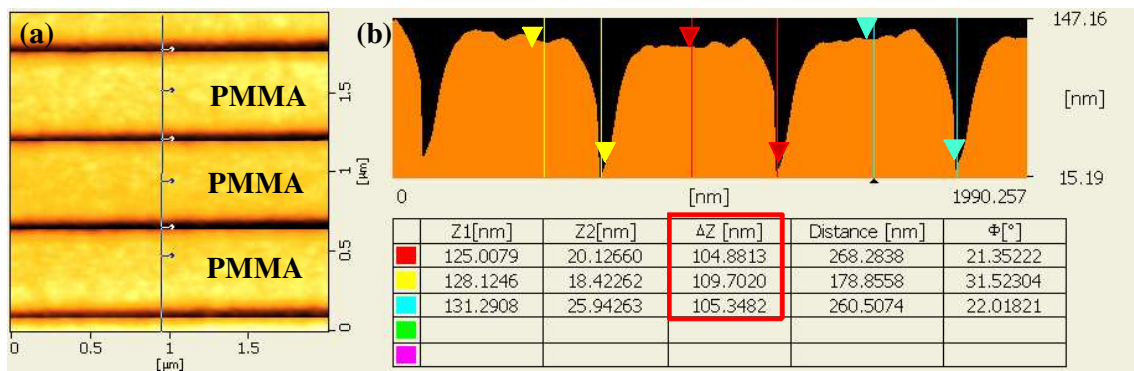

**Figure S1.** AFM image for PMMA patterned using electron beam lithography process: (a) image of the patterned PMMA; (b) scan profile along the line in image (a).
